# Supplementary material
Source: PubMed Central journal article supplement (PMC5312617)
Supplement: Supp_Figure2.pdf [file Supp_Figure2.pdf]

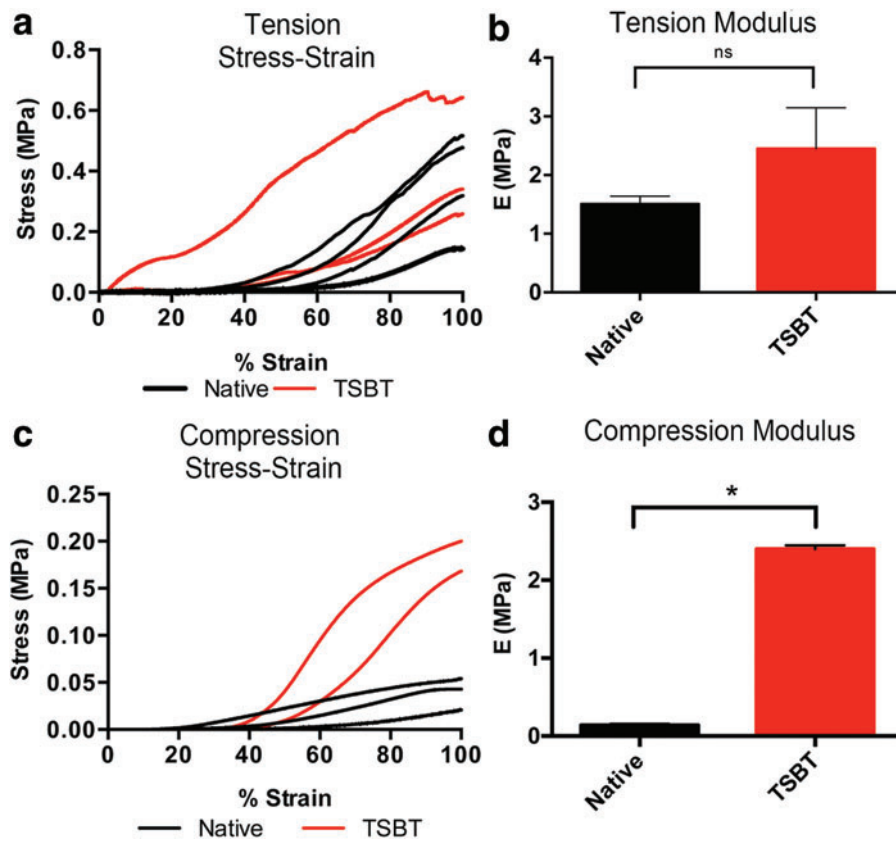

**SUPPLEMENTARY FIG. S2.** Mechanical characterization of 6-mm diameter TSBTs and primate tracheas: Stress-strain curves for tensile (**a**) and for compressive (**c**) loads comparing engineered tissue (*red*) with native primate trachea (*black*). Tensile and compressive moduli for TSBT and primate trachea are shown in (**b**) and (**d**), respectively. For tensile studies,  $n=5$  for native primate tracheas;  $n=3$  for 6-mm TSBTs. For compression studies,  $n=3$  for native trachea, and  $n=2$  for 6-mm TSBTs. \* denotes  $p < 0.05$ .
