# Supplementary material
Source: PubMed Central journal article supplement (PMC5312617)
Supplement: Supp_Figure4.pdf [file Supp_Figure4.pdf]

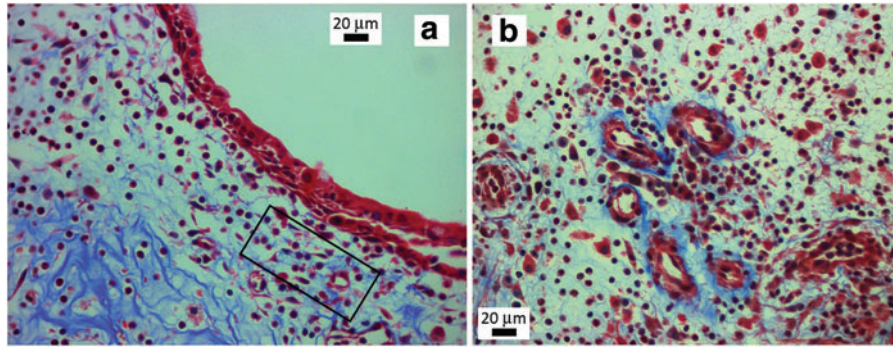

**SUPPLEMENTARY FIG. S4.** TSBT wall remodeled at 7 weeks in a primate model. Masson's Trichrome staining—*blue* indicates collagen. (a) Low power image showing luminal areas of the graft have completely remodeled with host cells, little collagen observable (b) Enlarged representative areas (rectangular box in [a]) show collagen staining around microvascular structures. Scale bar: (a, b) 20 μm.
