# Supplementary material
Source: PubMed Central journal article supplement (PMC5312617)
Supplement: Supp_Figure5.pdf [file Supp_Figure5.pdf]

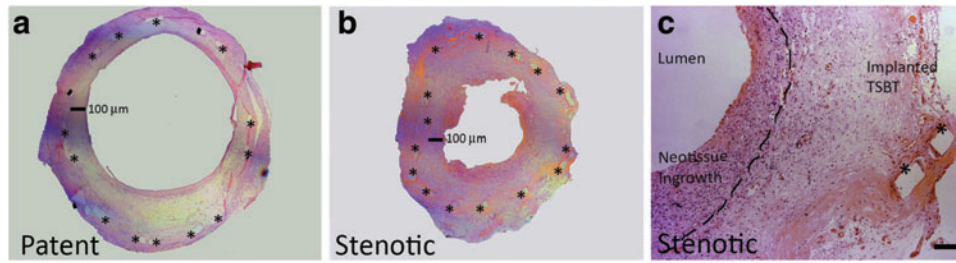

**SUPPLEMENTARY FIG. S5.** Example of a stenotic outcome: H&E stain of patent TSBT explanted at 8 weeks (a). Low power (b) and high power (c) images of H&E staining indicating luminal thickening of a stenotic graft. *Asterisk* (\*) indicates location of metal stent struts. Scale bars: (a, b), 100  $\mu\text{m}$ ; (c), 20  $\mu\text{m}$ . H&E, hematoxylin and eosin.
